# Supplementary material for: Natural Selection Constrains Neutral Diversity across A Wide Range of Species
Source: PLoS Biol. 2015 Apr 10;13(4):e1002112. doi: 10.1371/journal.pbio.1002112 (PMC4393120; doi:10.1371/journal.pbio.1002112)
Supplement: S1 Data — (XLS) [file pbio.1002112.s001.xls]

## Sheet: S5 Data
Species	Abbreviation	Kingdom	subgroup	tau	pvalue
Anopheles gambiae	agam	animal	invert	0.282353	7.54573e-13
Apis mellifera scutellata	amel	animal	invert	0.0766353	0.0355099
Arabidopsis thaliana	atha	plant	herb	0.141815	0.00117928
Brachypodium distachyon	bdis	plant	herb	0.110021	0.00014402
Bombyx mandarina	bmor	animal	invert	0.18733	4.95935e-16
Bos taurus	btau	animal	vert	-0.00636155	0.561277
Caenorhabditis briggsae	cbri	animal	invert	0.191668	0.000294405
Citrus reticulata	ccle	plant	woody	-0.142929	6.36383e-07
Caenorhabditis elegans	cele	animal	invert	0.146154	0.00547166
Citrullus lanatus lanatus	clan	plant	herb	-0.117871	6.18768e-06
Canis lupus	clup	animal	vert	0.0960326	2.24011e-15
Capsella rubella	crub	plant	herb	0.261009	1.16734e-09
Cucumis sativus var. hardwickii	csat	plant	herb	0.0947046	0.00610999
Cynoglossus semilaevis	csem	animal	vert	0.250555	8.74014e-19
Drosophila melanogaster	dmel	animal	invert	0.519605	1.35049e-26
Drosophila pseudoobscura	dpse	animal	invert	0.463728	1.2855e-07
Danio rerio	drer	animal	vert	0.150405	2.36621e-30
Equus ferus przewalskii	ecab	animal	vert	0.0374461	0.00241401
Ficedula albicollis	falb	animal	vert	0.0780495	1.12275e-06
Gasterosteus aculeatus	gacu	animal	vert	0.291391	7.84706e-33
Gallus gallus	ggal	animal	vert	0.174567	3.33108e-26
Glycine soja	gmax	plant	herb	0.0751829	8.61757e-06
Gossypium raimondii	grai	plant	woody	0.0671592	0.000126736
Heliconius melpomene melpomene	hmel	animal	invert	0.107901	0.000853725
Homo sapiens	hsap	animal	vert	0.113716	2.12947e-22
Lepisosteus oculatus	locu	animal	vert	0.1942	2.06606e-27
Meleagris gallopavo	mgal	animal	vert	0.117051	2.07377e-11
Macaca mulatta	mmul	animal	vert	0.102227	8.90598e-19
Mus musculus castaneus	mmus	animal	vert	0.0656752	3.66026e-09
Medicago truncatula	mtru	plant	herb	0.279989	6.67318e-22
Ovis canadensis	oari	animal	vert	0.0704207	1.68959e-09
Oryzias latipes	olat	animal	vert	-0.0596066	0.00116799
Oryza rufipogon	osat	plant	herb	0.00790365	0.747152
Papio anubis	panu	animal	vert	0.0724946	5.58819e-10
Prunus davidiana	pper	plant	woody	-0.0499205	0.132532
Populus trichocarpa	ptri	plant	woody	0.0447555	0.0826044
Sorghum bicolor subsp. verticilliflorum	sbic	plant	herb	0.0953003	2.61522e-06
Setaria italica	sita	plant	herb	0.145495	9.32487e-10
Sus scrofa	sscr	animal	vert	0.257143	7.25004e-110
Zea mays ssp parviglumis	zmay	plant	herb	0.0679628	1.02498e-10
