# Supplementary material for: Natural Selection Constrains Neutral Diversity across A Wide Range of Species
Source: PLoS Biol. 2015 Apr 10;13(4):e1002112. doi: 10.1371/journal.pbio.1002112 (PMC4393120; doi:10.1371/journal.pbio.1002112)
Supplement: S14 Table — (XLS) [file pbio.1002112.s017.xls]

## Sheet: S14 Table
species	abbreviation	selfing	selfing estimate	reference
Anopheles gambiae	agam	no	NA	NA
Apis mellifera	amel	no	NA	NA
Arabidopsis thaliana	atha	yes	0.99	1
Bombyx mori	bmor	no	NA	NA
Bos taurus	btau	no	NA	NA
Brachypodium distachyon	bdis	yes	0.99	2
Caenorhabditis briggsae	cbri	yes	0.99	assumed identical to C. elegans
Caenorhabditis elegans	cele	yes	0.99	3
Canis lupus	clup	no	NA	NA
Capsella rubella	crub	yes	1-0.7 (maximum likelihood at 1)	4
Citrullus lanatus	clan	partial	0.47-0.54	5
Citrus clementina	ccle	NA	NA	NA
Cucumis sativus	csat	partial	0.3-0.35	6
Cynoglossus semilaevis	csem	no	NA	NA
Danio rerio	drer	no	NA	NA
Drosophila melanogaster	dmel	no	NA	NA
Drosophila pseudoobscura	dpse	no	NA	NA
Equus caballus	ecab	no	NA	NA
Ficedula albicollis	falb	no	NA	NA
Gallus gallus	ggal	no	NA	NA
Gasterosteus aculeatus	gacu	no	NA	NA
Glycine max	gmax	yes	0.87	7
Gossypium raimondii	grai	yes	0.98	8
Heliconius melpomene	hmel	no	NA	NA
Homo sapiens	hsap	no	NA	NA
Lepisosteus oculatus	locu	no	NA	NA
Macaca mulatta	mmul	no	NA	NA
Medicago truncatula	mtru	yes	0.99	9
Meleagris gallopavo	mgal	no	NA	NA
Mus musculus	mmus	no	NA	NA
Oryza sativa	osat	partial	0.7	10
Oryzias latipes	olat	no	NA	NA
Ovis aries	oari	no	NA	NA
Papio anubis	panu	no	NA	NA
Populus trichocarpa	ptri	no	NA	11
Prunus persica	pper	NA	NA	NA
Setaria italica	sita	yes	0.96	12
Sorghum bicolor	sbic	partial	0.7	13
Sus scrofa	sscr	no	NA	NA
Zea mays	zmay	partial	0.5	14

## Sheet: Citations
1. Abbott RJ, Gomes MF (1989) Population genetic structure and outcrossing rate of Arabidopsis thaliana (L.) Heynh. Heredity 62(3): 411-418.
2. Bakker EG, Montgomery B, Nguyen T, Eide K, Chang J, et al. (2009). Strong population structure characterizes weediness gene evolution in the invasive grass species Brachypodium distachyon. Molecular ecology, 18(12): 2588-2601.
3. Barrière A, and Félix MA (2005) High Local Genetic Diversity and Low Outcrossing Rate in Caenorhabditis elegans Natural Populations. Current Biology, 15(13): 1176-1184.
4. Foxe JP, Slotte T, Stahl EA, Neuffer B, Hurka H, and Wright SI (2009) Recent speciation associated with the evolution of selfing in Capsella. Proceedings of the National Academy of Sciences. 106(13): 5241-5245.
5. Kumar R, Dia M, and Wehner TC (2013) Implications of mating behavior in watermelon breeding. HortScience. 48(8): 960-964.
6. Jenkins JM (1942) Natural self-pollination in cucumbers. Proc. Amer. Soc. Hort. Sci. 40: 411–412.
7. Fujita R, Ohara M, Okazaki K, and Shimamoto Y (1997) The extent of natural cross-pollination in wild soybean (Glycine soja). Journal of Heredity. 88(2): 124-128.
8. Afzal M, Kahn HA (1950) Natural crossing in cotton in Western Punjab. 2. Natural crossing under field conditions. Agronomy Journal. 42: 89-93.
9. Siol M, Prosperi JM, Bonnin I, and Ronfort J. (2008). How multilocus genotypic pattern helps to understand the history of selfing populations: a case study in Medicago truncatula. Heredity. 100(5): 517-525.
10. Gao H, Williamson S, and Bustamante CD (2007) A Markov chain Monte Carlo approach for joint inference of population structure and inbreeding rates from multilocus genotype data. Genetics, 176(3): 1635-1651.
11. Leffler EM, Bullaughey K, Matute DR, Meyer WK, Segurel L, et al. (2012) Revisiting an old riddle: what determines genetic diversity levels within species? PLoS Biology. 10(9): e1001388.
12. Siles MM, Baltensperger DD, and Nelson LA (2001) Technique for Artificial Hybridization of Foxtail Millet. Crop science. 41(5): 1408-1412.
13. Rooney WL, and Smith CW (2000) Techniques for developing new cultivars.Sorghum: Origin, history, technology and production. John Wiley & Sons, New York. 329-347.
14. Hallauer AR, Carena MJ, and Filho MJD (2010) Quantitative genetics in maize breeding (Vol. 6). Springer.
